# Supplementary material for: Effects of tumor necrosis factor- α rs1800629 and interleukin- 10 rs1800872 genetic variants on type 2 diabetes mellitus susceptibility and metabolic parameters among Jordanians
Source: publisher site journal article supplement (doi:10.1515/dmpt-2024-0002), 2024-05-14
Supplement: Supplementary file 1 [file j_dmpt-2024-0002_suppl_002.docx]

**Supplementary Figure 1. Agarose gel electrophoresis of *TNF-α rs1800629* genotype.** The concentration of gel electrophoresis was 4% and it stained by red safe. Lane M refers to 100bp DNA ladder. Lanes 1,3,4, and 5 represent the wild GG genotype with an 87bp and 22bp. Lane 6 represents the heterozygous GA genotype which is identified by 3 bands 107bp, 87bp, and 22bp. Lane 2 represents the homozygous AA genotype which was identified after digestion into one band 107bp.

**Supplementary Figure 2. Agarose gel electrophoresis of *IL-10 rs1800872* genotype.** The concentration of agarose gel was 2.5% and it is stained by ethidium bromide solution, lane M refers to the 100bp DNA ladder. Lane 1,3,5,8, and 9 represent the wild *IL-10 rs1800872* genotype resulted in one band of 579bp. Lane 2,4,6,7 represents the heterozygous genotype CA resulted in bands with 579bp,260bp,240bp,42bp,29bp, while homozygous AA genotype was identified after digestion in to 4 bands with 260bp,240bp,42bp, and 29bp.
